# Supplementary material for: Gene and lncRNA co-expression network analysis reveals novel ceRNA network for triple-negative breast cancer
Source: PubMed Central journal article supplement (PMC6805880; doi:10.1038/s41598-019-51626-7), 2019-10-22
Supplement: 41598_2019_51626_MOESM1_ESM.pdf [file 41598_2019_51626_MOESM1_ESM.pdf]

# Gene and lncRNA co-expression network analysis reveals novel ceRNA network for triple-negative breast cancer

Kehao Le<sup>1\*</sup>, Hui Guo<sup>1\*</sup>, Qiulei Zhang<sup>1</sup>, Xiaojuan Huang<sup>2</sup>, Ming Xu<sup>1</sup>, Ziwei Huang<sup>1</sup>, Pengfei Yi<sup>1,a</sup>

<sup>1</sup> Department of Breast and Thyroid Surgery, Union Hospital, Tongji Medical College, Huazhong University of Science and Technology, Wuhan, China

<sup>2</sup> Department of Nuclear Medicine, Union Hospital, Tongji Medical College, Huazhong University of Science and Technology, Wuhan, China

\* These authors contribute equally to this work.

<sup>a</sup> Correspondence: Pengfei Yi, Department of Breast and Thyroid Surgery, Union Hospital, Tongji Medical College, Huazhong University of Science and Technology, Wuhan 430022, China.

Email: yipengfei1986@126.com

Supplementary Table 1. Z-score of gene modules

| Module    | Z-score |
|-----------|---------|
| blue      | 47      |
| brown     | 34      |
| gold      | 32      |
| green     | 23      |
| grey      | 24      |
| red       | 15      |
| turquoise | 40      |
| yellow    | 48      |

Supplementary Table 2. Z-score of lncRNA modules

| Module    | Z-score |
|-----------|---------|
| blue      | 1.5     |
| gold      | 18      |
| grey      | 13      |
| turquoise | 25      |

Supplementary Table 3. Hub lncRNAs identified in the preserved turquoise and blue.

| Modules             | Hub lncRNAs                                                                                                                                                                                                                                                                                                                                                                                                                                                                                                                                                                                        |
|---------------------|----------------------------------------------------------------------------------------------------------------------------------------------------------------------------------------------------------------------------------------------------------------------------------------------------------------------------------------------------------------------------------------------------------------------------------------------------------------------------------------------------------------------------------------------------------------------------------------------------|
| <b>MEturquoise*</b> | RAD51-AS1, LOC283788, EIF1B-AS1, LOC101243545, ITGA9-AS1, LINC00102, LOC102546226, NCK1-AS1, LOC101928818, LOC100506844, LHFPL3-AS1, SUGT1P3, WAC-AS1, LOC101928844, LINC00691, LOC101927040, SUGT1P1, LOC101927079, LOC101928201, LINC00320, LOC100126784, WHAMMP2, ADD3-AS1, LOC100240728, LOC101927870, LOC286190, LOC100133920, LINC01085, LOC389834, LOC654342, BRD7P3, ATP8B5P, SH3GL1P1, HOXA-AS2, LOC101929681, LINC00997, SNHG1, LINC01020, WDR86-AS1, SNHG10, TRAF3IP2-AS1, LINC00485, LINC00266-1, LOC101929239, LINC00844, LOC400620, LOC100133920, LOC101928781, ANKRD20A12P, OR5AK4P |
| <b>MEblue</b>       | BRD7P3, LINC00702                                                                                                                                                                                                                                                                                                                                                                                                                                                                                                                                                                                  |

\*50 of 459 hub lncRNAs in MEturquoise are listed.

Supplementary Table 4. Hub mRNAs identified in the preserved modules.

| Modules        | Hub mRNAs                                                                                                                                                                                                                                                                                                           |
|----------------|---------------------------------------------------------------------------------------------------------------------------------------------------------------------------------------------------------------------------------------------------------------------------------------------------------------------|
| <b>MEgreen</b> | CXCL10, STAT1, CD80, GBP5, CXCL11, LAMP3, EPSTI1, NMI, OAS2, LAP3, IDO1, OASL, RSAD2, ETV7, OAS3, TRIM69, DTX3L, PARP12, RNF213, PARP9, PSMB9, NLRC5, PARP14, OAS1, SAMD9, IFI44, IRF1, IFIH1, GBP7, IFIT3, WARS, HLA-G, HLA-F, IFI44L, IFIT2, DDX60, SAMD9L, HLA-C, GBP4, HLA-B, HLA-A, CD274, IFI35, GBP1, UBE2L6 |
| <b>MEbrown</b> | FPR3, CD86, LAPT5, TFEC, CTSS, HAVCR2, PIK3AP1, IGSF6, CTSC, CD84, NPL, NCF2, TLR8, CD68, MNDA, LCP1, PLEK, THEMIS2, EVI2A, CCR1, TYROBP, CYBB, ARRB2, CD4, GPR65, CECR1, BIN2, FYB, LPXN, NCKAP1L, CD53, VAV1, LY86, RHOG, PTAFR, BTK, HCK, CXorf21, CLEC4A, LCP2,                                                 |

SCIMP, MYO1F, C3AR1, RNASE6, LAIR1, EVI2B, C1QB, SRGN, HCST, C1QA, LGMN, IL10RA, DOCK2, DPYD, LY96, C1orf162, CD163, ALOX5, ADAP2, HLA-DRB3, AOA, HLA-DMB, NCF4, SELPLG, HLA-DMA, SLC8A1, CYTH4, LAIR2, SLCO2B1, HLA-DRB1, HCLS1, LRRC25, TPP1, MILR1, TBXAS1, MPEG1, CD14, CASS4, GMFG, SH2B3, AIF1, SAMHD1

**MEred**

BGN, CTHRC1, FN1, COL1A1, LRRC15, COL3A1, COL5A2, MMP14, COL5A1, COL1A2, BMP1, ADAMTS2, SPARC, MXRA5, CDH11

**MEblue**

ABCA10, CTTNBP2, FXYD1, LDB2, ABCA9, TTC28, PGM5, NOVA1, ARHGAP6, KIAA1377, KL, SDPR, ACOX2, TENC1, FAM162B, FAM13C, ARHGAP20, TSHZ2, GSN, FAXDC2, JAM2, ZNF385D, MOCS1, FIGF, RHOJ, LEPR, ALDH1A2, LRRN4CL, CEP112, FGF10, TSPAN7, PPAP2B, PDGFD, FAT4, EBF1, CD34, PLSCR4, ABCA6, MEOX2, GPR124, GPC3, GIPC2, ABCA8, FHL1, ACACB, CCL14, AGTR1, EBF3, SHE, BMX, MMRN2, DLC1, EMCN, LAMA2, EBF2, RAMP2, ZNF423, CASQ2, ASPA, TNS1, CXorf36, TMEM88, NPR1, ERG, CXCL12, DCLK1, SH3D19, KANK2, ITIH5, RECK, MYCT1, LPAR1, MFAP4, ANGPTL1, LHFP, ECSCR, TBX15, FHL5, GNG11, FLRT2, CYBRD1, SLIT3, ADH1C, SPARCL1, CFD, FAM198B, TFPI, S1PR1, PPARG, CDO1, ANK2, CPED1, AKAP12, INMT, ADH1A, TEK, ADH1B, OLFML1, FILIP1L, SRPX, TNXB, EDNRB, CLEC14A, GAS7, DPT, ZCCHC24, OGN, CDH5, IL33, LRP1, DCN, CHRDL1, FMOD, CNRIP1, VWF, ANTXR2, EHD2, PODN, ABI3BP, CDK15, TWIST2, FABP4, RFTN2, COL14A1, AOX1, MAP1A, GPX3, MAF, STARD8, PCSK5, IGFBP4, HSPB6, PPAP2A, ZEB1, IGF1, ITSN1, LYVE1, ZEB2, CRTAP, CRHBP, GNG2, CST3

**MEyellow**

ICOS, CCR4, FERMT3, SNX20, CTLA4, ARHGAP30, CD72, MYO1G, SELL, CD37, IRF8, CCR7, SASH3, CD52, TRAF3IP3, C5orf20, FMNL1, CD48, IL21R, P2RY8, LCK, JAK3, CD6, SLA2, GZMK, WDFY4, STK10, DENND1C, CCR5, GPR171, WAS, EOMES, PARVG, CCL5, RASSF5, STAP1, CD5, GPR18, CD226, LTB, CAMK4, CST7, ITGB7, CD247, TRAT1, SLAMF6, NKG7, SIRPG, CYTIP, SIPA1, FCRL3, RAC2, TAGAP, IL2RB, CARD11, ARHGAP9, TRAV1-2, ACAP1, ICAM3, GZMH, SH2D1A, ZBP1, PRKCB, TIGIT, HLA-DQB1, CD2, RASAL3, CD38, SP140, PLAC8, FAM78A, NCF1, FAIM3, HMHA1, KLHL6, MAP4K1, IKZF3, TRAF1, CD3G, ITK, SAMD3, PARP15, CD8A, UBASH3A, CD96, PRF1, IL2RG, KLRG1, IKZF1, PLCB2, GRAP2, CD3E, ZNF831, ZAP70, TMC8, BANK1, PYHIN1, CLEC2D, BTLA, ARHGAP15, LAX1, CD69, CD27, ARHGAP25, CRTAM, ANKRD44, CCR2, IPCEF1, CCR6, C16orf54, DOCK10, FGD2, WIPF1, CXCR6, LY9, GIMAP2

**MEturquoise**

NUSAP1, MKI67, TOP2A, ANLN, CKAP2, HIST1H3B, KIF11, CCNA2, CEP55, LMNB1, ARHGAP11A, ARHGAP11B, NCAPG, KPNA2, BUB1, CENPE, PRR11, PLK1, CENPF, CDK1, CKAP2L, CRY2, HIST1H2AM, CASC5, CENPN, KIF20A, NDC80, FAM72D, DTL, SKA3, H2AFZ, AURKA, HIST1H2BO, HIST1H2BF, KIF4A, KIF2C, KIF23, TTK, PRC1, CLSPN, MELK, CKS2, CCNB2, SMC4, STIL, RACGAP1, EZH2, HIST1H3D, CENPA, KIF14, HJURP, CCNB1, PAK6, HIST1H2AH, UBE2T, NCAPH, STMN1, BLM, HIST1H2BJ, ECT2, HIST1H2AE, EXO1, FAM72B, DBF4, CENPO, CDC6, SGOL1, UBE2C, E2F3, FAM72A,

---

MYBL2, MAD2L1, FEN1, MCM10, BIRC5, ATAD2, SRPK1, HDGF, PBK, FAM83D, HIST1H2AB, KIF15, KIF18A, CDC7, GINS1, CDC25C, RAD51, MCM4, PCNA, MCM6, KIAA1524, FOXM1, CDC123, DIAPH3, POLQ, CENPL, WDHD1, BRIP1, DEPDC1, CDC20, IQGAP3, TRIP13, CENPI, SMG5, SGK494, PTTG1, CDC45, NUDT5, SKA1, RAD51AP1, TYMS, UQCRHL, CHEK1, ORC1, NEK2, RAD54L, TICRR, CDCA8, RNASEH2A, METTL13, OIP5, MASTL, CDCA2, DNA2, PLK4, HIST1H2BN, DONSON, SGOL2, MND1, CDC25A, ILF2, DEPDC1B, XRCC2, AURKB, SMC2, ZNF695, CTPS1, ORC6, INCENP, CHAF1B, MCM2, CCNE2, PRIM2, KIF22, RQCD1, RFWD3, NUDCD1, CDCA3, NCAPG2, PRCC, ATAD5, CKAP5, PTMA, C1orf131, XPO5, NDC1, TOPBP1, FBXO5, GMPS, MCM7, SUV39H2, PFDN2, LIN9, DSCC1, SNRPD1, C1orf112, URB2, RAD21, SNRPG, UCK2, RAD54B, SNRPC, GPSM2, TBCE, GTPBP4, MCM3, RFC4, SNRPA1, SASS6, TCF19, DHX9, CKS1B, DKC1, BYSL, CDK2, USP1, ANP32E, BARD1, SSRP1, SEPHS1, HIST1H3J

Supplementary Table 5. Gene Ontology enrichment analysis of genes in turquoise module.

| Term       | Pathway                                                 | Pvalue      | Count |
|------------|---------------------------------------------------------|-------------|-------|
| GO:0051301 | cell division                                           | 2.91E-39    | 56    |
| GO:0008283 | cell proliferation                                      | 1.47E-10    | 27    |
| GO:0051726 | regulation of cell cycle                                | 1.03E-09    | 16    |
| GO:1901796 | regulation of signal transduction by p53 class mediator | 7.76E-08    | 14    |
| GO:0016925 | protein sumoylation                                     | 2.35E-06    | 12    |
| GO:0007051 | spindle organization                                    | 3.51E-06    | 6     |
| GO:0007049 | cell cycle                                              | 8.90E-06    | 15    |
| GO:0000722 | telomere maintenance via recombination                  | 9.17E-06    | 7     |
| GO:0000910 | cytokinesis                                             | 1.01E-04    | 7     |
| GO:0001833 | inner cell mass cell proliferation                      | 7.61E-04    | 4     |
| GO:0045814 | negative regulation of gene expression, epigenetic      | 0.001099737 | 6     |
| GO:0031047 | gene silencing by RNA                                   | 0.001856988 | 8     |
| GO:0006606 | protein import into nucleus                             | 0.002148204 | 6     |
| GO:0006281 | DNA repair                                              | 6.48E-16    | 28    |

Supplementary Table 6. The KEGG pathways of genes in turquoise module.

| Term     | Pathway                                 | Pvalue      | Count |
|----------|-----------------------------------------|-------------|-------|
| hsa04110 | Cell cycle                              | 5.07E-28    | 32    |
| hsa03030 | DNA replication                         | 1.57E-11    | 12    |
| hsa05322 | Systemic lupus erythematosus            | 1.41E-09    | 17    |
| hsa04114 | Oocyte meiosis                          | 6.90E-08    | 14    |
| hsa05034 | Alcoholism                              | 8.06E-08    | 17    |
| hsa04914 | Progesterone-mediated oocyte maturation | 2.21E-05    | 10    |
| hsa05203 | Viral carcinogenesis                    | 6.84E-05    | 14    |
| hsa04115 | p53 signaling pathway                   | 1.76E-04    | 8     |
| hsa03440 | Homologous recombination                | 0.001635591 | 5     |
| hsa03430 | Mismatch repair                         | 0.007608572 | 4     |

|          |                        |             |   |
|----------|------------------------|-------------|---|
| hsa03460 | Fanconi anemia pathway | 0.014519525 | 5 |
| hsa05222 | Small cell lung cancer | 0.017727563 | 6 |
| hsa03410 | Base excision repair   | 0.020600369 | 4 |
| hsa05161 | Hepatitis B            | 0.045072484 | 7 |

---
